# Supplementary material for: Spectral Domain Optical Coherence Tomography in Awake Rabbits Allows Identification of the Visual Streak, a Comparison with Histology
Source: PubMed Central journal article supplement — Transl Vis Sci Technol. 2020 Apr 23;9(5):13. doi: 10.1167/tvst.9.5.13 (PMC7401941; doi:10.1167/tvst.9.5.13), 2020-04-23
Supplement: tvst-9-5-13_s001.pdf [file tvst-9-5-13_s001.pdf]

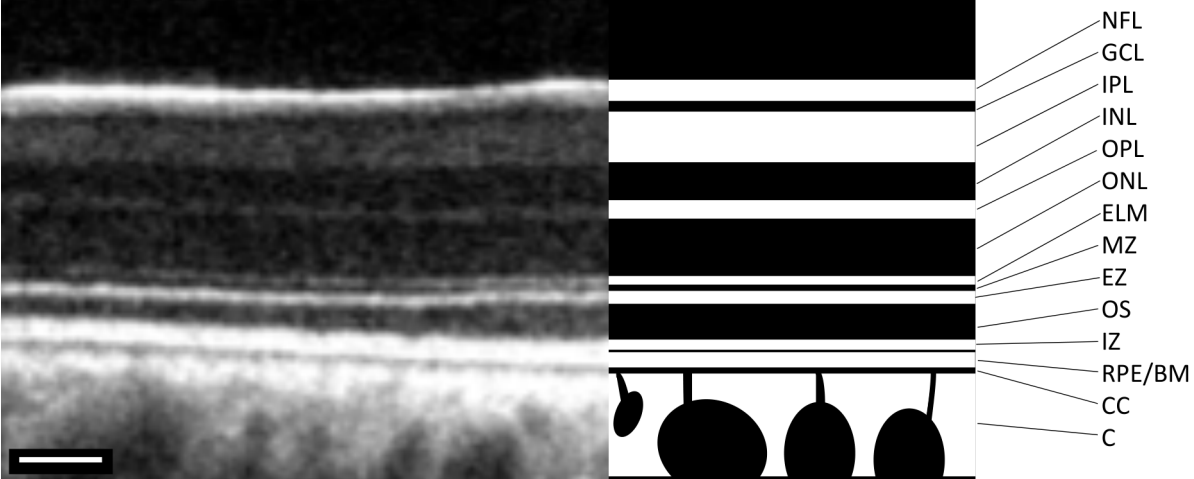

**Figure S1: Nomenclature of Inner and Outer Retinal Bands visible on SD-OCT B-scan images in rabbits.** Schematic of the hyporeflective and hyperreflective retinal bands of the rabbit retina and choroid visible on SD-OCT B-scans. The nomenclature of the different retinal layers/zones was based on the OCT nomenclature consensus published by Staurenghi et al.<sup>40</sup> Scale Bar = 50 $\mu$ m. NFL (nerve fiber layer); GCL (ganglion cell layer); IPL (inner plexiform layer); INL (inner nuclear layer); OPL (outer plexiform layer); ONL (outer nuclear layer); ELM (external limiting membrane); MZ (myoid zone); EZ (ellipsoid zone); OS (outer segment); IZ (interdigitation zone); RPE/BM (retinal pigment epithelium/Bruch's membrane complex); CC (choriocapillaris); C (choroid).
