# Supplementary material for: Spectral Domain Optical Coherence Tomography in Awake Rabbits Allows Identification of the Visual Streak, a Comparison with Histology
Source: PubMed Central journal article supplement — Transl Vis Sci Technol. 2020 Apr 23;9(5):13. doi: 10.1167/tvst.9.5.13 (PMC7401941; doi:10.1167/tvst.9.5.13), 2020-04-23
Supplement: tvst-9-5-13_s002.pdf [file tvst-9-5-13_s002.pdf]

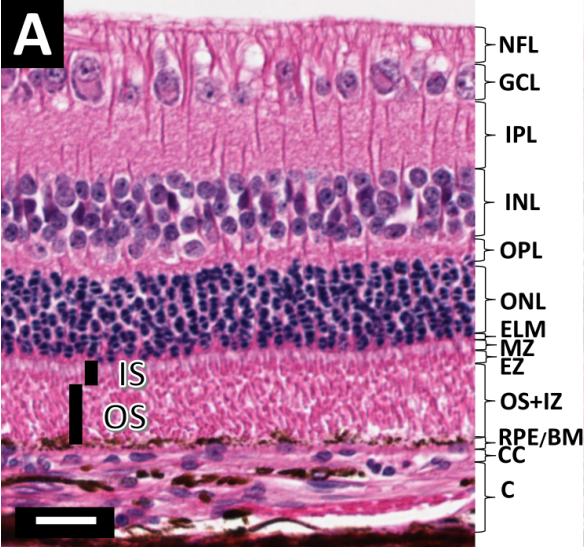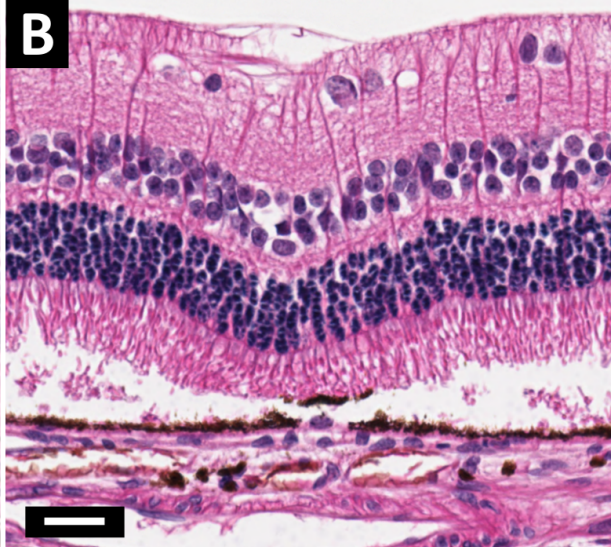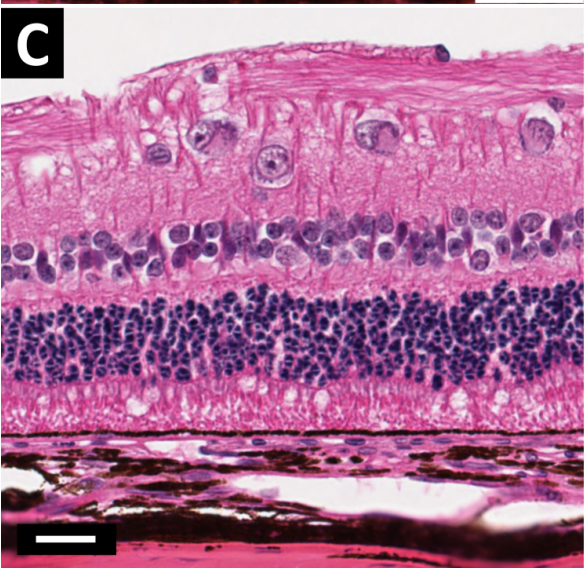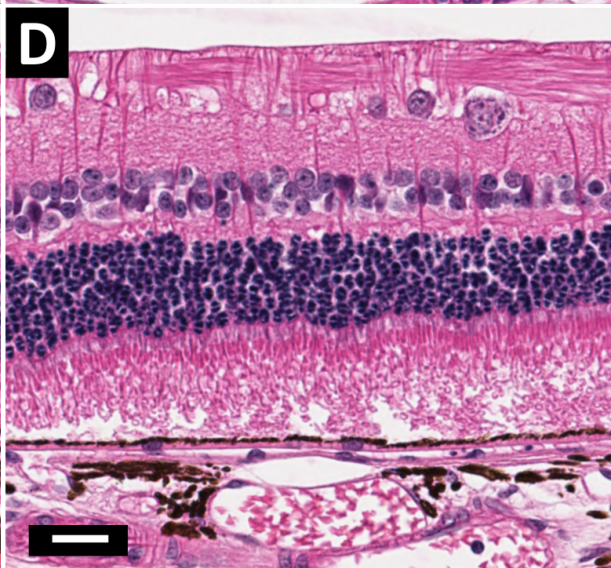

Figure S2: **Hematoxylin-eosin stained retinal sections demonstrating histological processing artifacts.** (A) Ideal preservation of retinal layer anatomy, especially of the outer retina, including the photoreceptor inner and outer segments (black bars indicate IS and OS layers). (B) Artifactual detachment of the neuroretina from the RPE, (C) crushing of the photoreceptor layer and/or (D) oblique sections through the photoreceptor outer segment layer caused difficulties during the acquisition of histological measurements and decreased measurement precision in some sections. Scale Bars = 20  $\mu$ m. NFL (nerve fiber layer); GCL (ganglion cell layer); IPL (inner plexiform layer); INL (inner nuclear layer); OPL (outer plexiform layer); ONL (outer nuclear layer); ELM (external limiting membrane); MZ (myoid zone); EZ (ellipsoid zone); OS + IZ (outer segment plus interdigitation zone); RPE/BM (retinal pigment epithelium/Bruch's membrane complex); CC (choriocapillaris); C (choroid).
