# Supplementary material for: Spectral Domain Optical Coherence Tomography in Awake Rabbits Allows Identification of the Visual Streak, a Comparison with Histology
Source: PubMed Central journal article supplement — Transl Vis Sci Technol. 2020 Apr 23;9(5):13. doi: 10.1167/tvst.9.5.13 (PMC7401941; doi:10.1167/tvst.9.5.13), 2020-04-23
Supplement: tvst-9-5-13_s003.pdf [file tvst-9-5-13_s003.pdf]

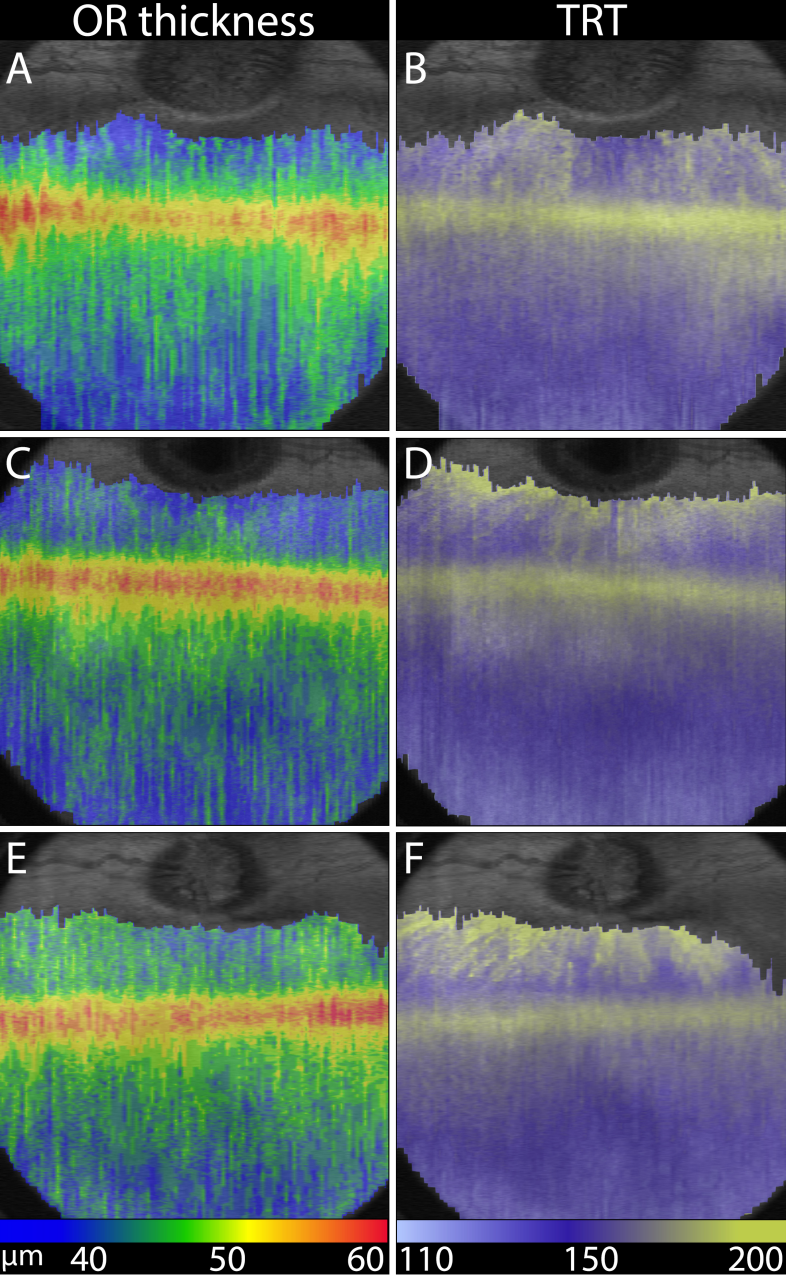

Figure S3: **Total and outer retinal thickness topography of eyes from three rabbits.** Rabbit 14 (A, B), rabbit 15 (C, D), rabbit 16 (E, F). (A, C, E) outer retinal (OR) thickness topography projected onto the OCT volume intensity projection image. (B, D, F) total retinal thickness (TRT) topography projected onto the OCT volume intensity projection image. False color scales are used to indicate OR thickness and TRT in  $\mu\text{m}$ .
