# Supplementary material for: Spectral Domain Optical Coherence Tomography in Awake Rabbits Allows Identification of the Visual Streak, a Comparison with Histology
Source: PubMed Central journal article supplement — Transl Vis Sci Technol. 2020 Apr 23;9(5):13. doi: 10.1167/tvst.9.5.13 (PMC7401941; doi:10.1167/tvst.9.5.13), 2020-04-23
Supplement: tvst-9-5-13_s006.pdf [file tvst-9-5-13_s006.pdf]

Table S2a: **Retinal thickness measurements derived from histology sections.** Estimated means and 95% confidence intervals (95% CI) based on the linear models for all histology section-derived retinal layer/zone thickness measurements at positions 1, 2, 3, 4, and 6mm ventral to the central and nasal ONH rim. Means that have either no superscript or no identical superscript are significantly different from each other (P<0.05). Means with identical superscript are not significantly different from each other (P>0.05). All measurements in  $\mu\text{m}$ .

| Retinal layer/zone thickness on histology: mean (95% CI) |         |                                     |                                     |                                     |                                     |                        |
|----------------------------------------------------------|---------|-------------------------------------|-------------------------------------|-------------------------------------|-------------------------------------|------------------------|
| Distance from ONH                                        |         | 1mm                                 | 2mm                                 | 3mm                                 | 4mm                                 | 6mm                    |
| IR                                                       | nasal   | 106.94<br>(104.74;109.13)           | 103.33<br>(101.13;105.53)           | 99.08<br>(96.90;101.25)             | 93.97<br>(91.81;96.12)              | 82.91<br>(80.74;85.08) |
|                                                          | central | 107.91<br>(105.75;110.07)           | 103.32<br>(101.17;105.48)           | 98.35<br>(96.19;100.51)             | 95.20<br>(93.04;97.37)              | 86.59<br>(84.43;88.75) |
| INL                                                      | nasal   | 20.86 <sup>a</sup><br>(20.33;21.39) | 20.74 <sup>a</sup><br>(20.20;21.27) | 18.75 <sup>b</sup><br>(18.23;19.27) | 18.24 <sup>b</sup><br>(17.73;18.76) | 15.82<br>(15.30;16.34) |
|                                                          | central | 17.50<br>(17.04;17.96)              | 22.12<br>(21.66;22.57)              | 19.31<br>(18.85;19.77)              | 18.21<br>(17.75;18.67)              | 16.25<br>(15.79;16.70) |
| ONL                                                      | nasal   | 27.31 <sup>c</sup><br>(26.39;28.22) | 27.68 <sup>c</sup><br>(26.76;28.60) | 26.50<br>(25.62;27.44)              | 24.79<br>(23.88;25.69)              | 20.71<br>(19.80;21.62) |
|                                                          | central | 27.66<br>(26.92;28.40)              | 26.09 <sup>d</sup><br>(25.35;26.83) | 26.23 <sup>d</sup><br>(25.49;26.97) | 25.17<br>(24.43;25.91)              | 21.11<br>(20.36;21.85) |
| OR                                                       | nasal   | 31.11 <sup>e</sup><br>(30.36;31.85) | 31.67 <sup>e</sup><br>(30.91;32.42) | 31.59 <sup>e</sup><br>(30.85;32.33) | 28.82<br>(28.09;29.56)              | 25.92<br>(25.18;26.66) |
|                                                          | central | 29.33<br>(28.82;29.84)              | 32.11<br>(31.61;32.61)              | 34.44<br>(33.93;34.95)              | 30.74<br>(30.24;31.24)              | 26.61<br>(26.11;27.11) |
| PROS                                                     | nasal   | 19.14<br>(18.68;19.60)              | 17.65<br>(17.19;18.11)              | 16.27<br>(15.81;16.72)              | 13.96<br>(13.51;14.41)              | 11.90<br>(11.44;12.34) |
|                                                          | central | 14.59<br>(14.24;14.94)              | 18.12<br>(17.78;18.46)              | 20.22<br>(19.87;20.57)              | 16.32<br>(15.97;16.66)              | 12.47<br>(12.13;12.81) |
