# Supplementary material for: Spectral Domain Optical Coherence Tomography in Awake Rabbits Allows Identification of the Visual Streak, a Comparison with Histology
Source: PubMed Central journal article supplement — Transl Vis Sci Technol. 2020 Apr 23;9(5):13. doi: 10.1167/tvst.9.5.13 (PMC7401941; doi:10.1167/tvst.9.5.13), 2020-04-23
Supplement: tvst-9-5-13_s008.pdf [file tvst-9-5-13_s008.pdf]

Table S3a: **Manual cell/row counts derived from central histology sections: numerical data.** Estimated means and standard deviations (SD) based on the linear models for ganglion cell and INL and ONL nuclei row counts at positions 1, 2, 3, 4, and 6 mm ventral to the central ONH rim. Means that have either no superscript or no identical superscript are significantly different from each other (P<0.05). Means with identical superscript are not significantly different from each other (P>0.05).

| <b>Histologic manual cell/row counts: mean (<math>\mu\text{m}</math>) +/- SD</b> |                              |                              |                              |                              |                 |
|----------------------------------------------------------------------------------|------------------------------|------------------------------|------------------------------|------------------------------|-----------------|
| <b>Distance from ONH</b>                                                         | <b>1</b>                     | <b>2</b>                     | <b>3</b>                     | <b>4</b>                     | <b>6</b>        |
| GC number                                                                        | 8,26 $\pm$ 2,72              | 12,45 $\pm$ 3,24             | 6,36 $\pm$ 2,13              | 4,35 $\pm$ 1,79              | 2,42 $\pm$ 1,67 |
| INL nuclei row                                                                   | 2,15 <sup>a</sup> $\pm$ 0,36 | 3,33 $\pm$ 0,50              | 2,93 $\pm$ 0,25              | 2,57 <sup>a</sup> $\pm$ 0,54 | 2,06 $\pm$ 0,24 |
| ONL nuclei row                                                                   | 4,64 $\pm$ 0,55              | 4,85 <sup>b</sup> $\pm$ 0,46 | 4,89 <sup>b</sup> $\pm$ 0,50 | 4,47 <sup>b</sup> $\pm$ 0,58 | 3,94 $\pm$ 0,35 |
