# Supplementary material for: Spectral Domain Optical Coherence Tomography in Awake Rabbits Allows Identification of the Visual Streak, a Comparison with Histology
Source: PubMed Central journal article supplement — Transl Vis Sci Technol. 2020 Apr 23;9(5):13. doi: 10.1167/tvst.9.5.13 (PMC7401941; doi:10.1167/tvst.9.5.13), 2020-04-23
Supplement: tvst-9-5-13_s009.pdf [file tvst-9-5-13_s009.pdf]

Table S3b: **P-values and significance levels for all comparisons of manual cell/row counts derived from central histology sections.** Multiple comparisons of means with Tukey's approach were performed between different measurement positions at 1, 2, 3, 4, and 6 mm ventral to the central ONH rim for ganglion cell and INL and ONL row counts. Comparison between positions x and y is indicated as x – y. Asterisks indicate significance levels for all significant differences: (\*)  $P \leq 0.05$  and (\*\*\*)  $P \leq 0.001$ .

| <b>P-values and significance levels for all comparisons of histology-derived manual cell/row counts</b> |            |            |              |              |              |              |              |              |              |              |
|---------------------------------------------------------------------------------------------------------|------------|------------|--------------|--------------|--------------|--------------|--------------|--------------|--------------|--------------|
| <b>Comparison between distance from ONH</b>                                                             | <b>1-2</b> | <b>1-3</b> | <b>1 - 4</b> | <b>1 - 6</b> | <b>2 - 3</b> | <b>2 - 4</b> | <b>2 - 6</b> | <b>3 - 4</b> | <b>3 - 6</b> | <b>4 - 6</b> |
| GC number                                                                                               | ***        | ***        | ***          | ***          | ***          | ***          | ***          | ***          | ***          | ***          |
| INL nuclei row                                                                                          | ***        | ***        | 0.30         | ***          | ***          | ***          | ***          | *            | ***          | ***          |
| ONL nuclei row                                                                                          | ***        | ***        | ***          | ***          | 0.99         | 0.98         | ***          | 0.84         | ***          | ***          |
